# Supplementary material for: Polyhedral perspectives on the capacity limit of cathode compounds for lithium-ion batteries: a case study for Li6CoO4
Source: Royal Society of Chemistry journal article supplement (doi:10.1039/c8cp02492h), 2018-01-01
Supplement: c8cp02492h1.pdf [file c8cp02492h1.pdf]

# Polyhedral Perspective on Capacity Limit of Cathode Compounds for Lithium-ion Battery: A Case Study for $\text{Li}_6\text{CoO}_4$

Zhenlian Chen,\* Zhifeng Zhang, Jun Li\*

Ningbo Institute of Materials Technology and Engineering, Chinese Academy of Sciences, Ningbo 315201, China.

## I. Prototype of tetrahedron structured $\text{Li}_2\text{O}$ and octahedron structured $\text{Li}_2\text{O}_2$

In tetrahedron structured  $\text{Li}_2\text{O}$ , the prototype is cubic lattice with space group  $Fm\bar{3}m$ , where all tetrahedral sites are occupied by Li within ABC stacked oxygen sublattice, shown in Fig.S1-a. However, within AB stacked oxygen sublattice, half tetrahedra share face with the other half, seen in Fig.S1-c, that would be energy unfavorable because the very strong repulsion between face-sharing tetrahedra while attraction between corner- or edge- sharing tetrahedra.<sup>1</sup> In addition, face sharing octahedra may only energy favor for metal ions totally disordered because the shared face is a strong geometric restriction, seen in Fig. S1-b and d.

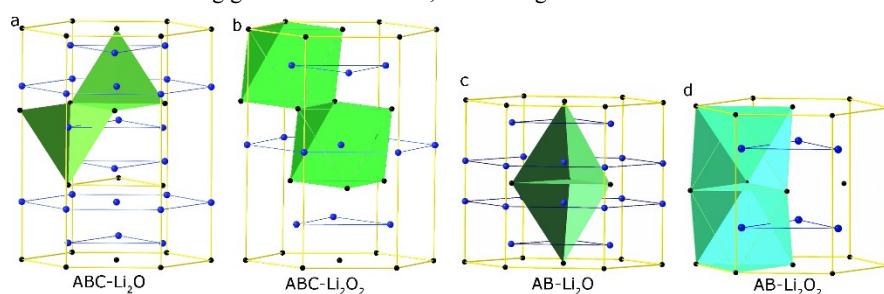

Figure S1 Prototypes of  $\text{Li}_2\text{O}_2$  and  $\text{Li}_2\text{O}$ .

## II. Madelung constant matrix

Of the  $P4_2/nmc$  unit cell with two formula  $\text{Li}_6\text{CoO}_4$ , the Madelung constant matrix is:

|       |       |       |       |       |       |       |       |       |       |       |   |
|-------|-------|-------|-------|-------|-------|-------|-------|-------|-------|-------|---|
| -0.80 | -0.01 | -0.21 | 0.00  | -0.10 | -0.15 | -0.10 | -0.15 | -0.15 | -0.10 | -0.15 | - |
|       | -0.80 | 0.00  | -0.21 | -0.15 | -0.10 | -0.15 | -0.10 | -0.10 | -0.15 | -0.10 | - |
|       |       | -0.80 | -0.01 | -0.15 | -0.10 | -0.15 | -0.10 | -0.10 | -0.15 | -0.10 | - |
|       |       |       | -0.80 | -0.10 | -0.15 | -0.10 | -0.15 | -0.15 | -0.10 | -0.15 | - |
|       |       |       |       | -0.76 | -0.19 | 0.00  | -0.01 | -0.17 | -0.13 | -0.17 | - |
|       |       |       |       |       | -0.76 | -0.01 | 0.00  | -0.13 | -0.17 | -0.13 | - |
|       |       |       |       |       |       | -0.76 | -0.19 | -0.17 | -0.13 | -0.17 | - |
|       |       |       |       |       |       |       | -0.76 | -0.13 | -0.17 | -0.13 | - |
|       |       |       |       |       |       |       |       | -0.76 | -0.19 | 0.00  | - |
|       |       |       |       |       |       |       |       |       | -0.76 | -0.01 | - |
|       |       |       |       |       |       |       |       |       |       | -0.76 | - |

The matrix is lower-upper symmetric and only the upper elements are shown.

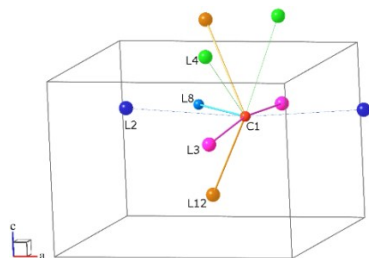

Figure S2 Neighbor connection of Co ion (C1) to Li ions (L2-4, 8, 12). Two L3-O<sub>4</sub> sharing corner with C1-O<sub>4</sub> for the periodicity along **a** axis, L1-O<sub>4</sub> along **b** axis and L10-O<sub>4</sub> along **c** axis; while one L6-O<sub>4</sub> sharing edge with C1-O<sub>4</sub>.

Table S1 More details for Table I in the text. Letters "L" and "C" represent Li and Co. The values of Madelung matrix elements are all negative. Bond length  $r_{ij}$  and Madelung matrix element  $M_{ij}$  are in unit of Å and Å<sup>-1</sup>,

respectively.

| Sharing Pattern                    |        | pair                                                             | $r_{ij}$ | $ M_{ij} $ |
|------------------------------------|--------|------------------------------------------------------------------|----------|------------|
| Co-Li                              | Edge   | C1,L(5,7,8,10); C2,L(6,9,11,12)                                  | 2.59     | 0.12       |
|                                    | Corner | C1,L(6,9,11,12);C2,L(5,7,8,10)                                   | 3.05     | 0.13       |
|                                    |        | C1,L(2,3); C2,L(1,4)                                             | 3.26     | 0.15       |
|                                    |        | C1,L(1,4);C2,L(2,3)                                              | 3.88     | 0.17       |
| Li <sub>4d</sub> -Li               | Edge   | L1,2; L3,4                                                       | 2.31     | 0.21       |
|                                    |        | L1,L(6,9,11,12); L2,L(5,7,8,10); L3,L(5,7,8,10); L4,L(6,9,11,12) | 2.33     | 0.1        |
|                                    | Corner | L1,L(5,7,8,10); L2,L(6,9,11,12); L3,L(6,9,11,12); L4,L(5,7,8,10) | 3.13     | 0.15       |
| Li <sub>8f</sub> -Li <sub>8f</sub> | Edge   | L5,9; L6,10; L7,11; L8,12                                        | 2.38     | 0.19       |
|                                    | Corner | L5,L(8,10); L6,L(9,11); L7,L(8,10); L12,L(9,11);                 | 2.83     | 0.13       |
|                                    |        | L5,L(6,12); L7,L(6,12); L8,L(9,11); L10,L(9,11)                  | 4        | 0.17       |

### III. Energy landscapes for Li/vacancy distribution configurations of delithiated phases

Nine distinct configurations are obtained for Li<sub>5</sub>CoO<sub>4</sub> and LiCoO<sub>4</sub> filtered among  $C_{12}^2 = 66$  configurations generated by combination algorithm, thirty-one for Li<sub>4</sub>CoO<sub>4</sub> and Li<sub>2</sub>CoO<sub>4</sub> filtered among  $C_{12}^4 = 495$  configurations, and fifty-one for Li<sub>3</sub>CoO<sub>4</sub> among  $C_{12}^6 = 924$  configurations. Different from cluster-expansion method, here repeating configurations are filtered and first-principles calculations are performed for all distinct configurations. Notably, the total energy landscapes show energy fluctuation not small, seen in Figure S3, suggesting the effect of Li/vacancy distribution on the phases is not ignorable.

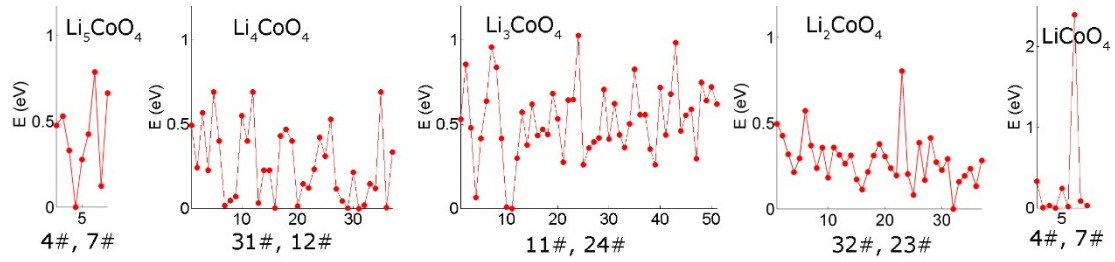

Figure S3 Calculated total energy landscapes for assumed delithiated phases. The unit of energy difference is eV/f.u. The horizontal axis is serial numbers, increasing with Madelung energies, and the serial number of the most stable and instable configurations are labeled below.

### IV. Electrochemical Performance

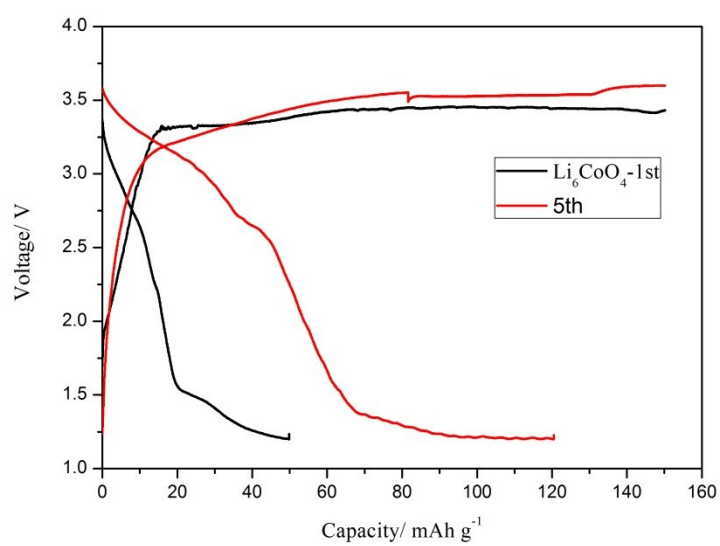

Figure S4 The first (black) and fifth (red) charge and discharge curves of Li/Li<sub>6</sub>CoO<sub>4</sub> cell.

## Reference

1. Chen, Z.; Li, J., A new method applicable to study solid compounds with multiple polyhedral structures. *Journal of Computational Chemistry* **2016**, 37 (16), 1476-1483.
